# Supplementary material for: Enhancement of organic field-effect transistor performance by incorporating functionalized double-walled carbon nanotubes
Source: Royal Society of Chemistry journal article supplement (doi:10.1039/c7ra03467a), 2017-01-01
Supplement: c7ra03467a1.pdf [file c7ra03467a1.pdf]

## Supplementary data for

### Enhancement of Organic Field-Effect Transistor Performance by incorporating Functionalized Double-walled Carbon Nanotubes

Yingli Chu,<sup>a</sup> Xiaohan Wu<sup>\*a</sup>, Juan Du,<sup>a</sup> Ziqi Liang<sup>b</sup> and Jia Huang<sup>\*a</sup>

<sup>a</sup>School of Materials Science and Engineering, Tongji University, Shanghai, 201804, P.R. China. E-mail: huangjia@tongji.edu.cn, xiaohanwu@tongji.edu.cn

<sup>b</sup>Department of Materials Science, Fudan University, Shanghai, 200433, P.R. China

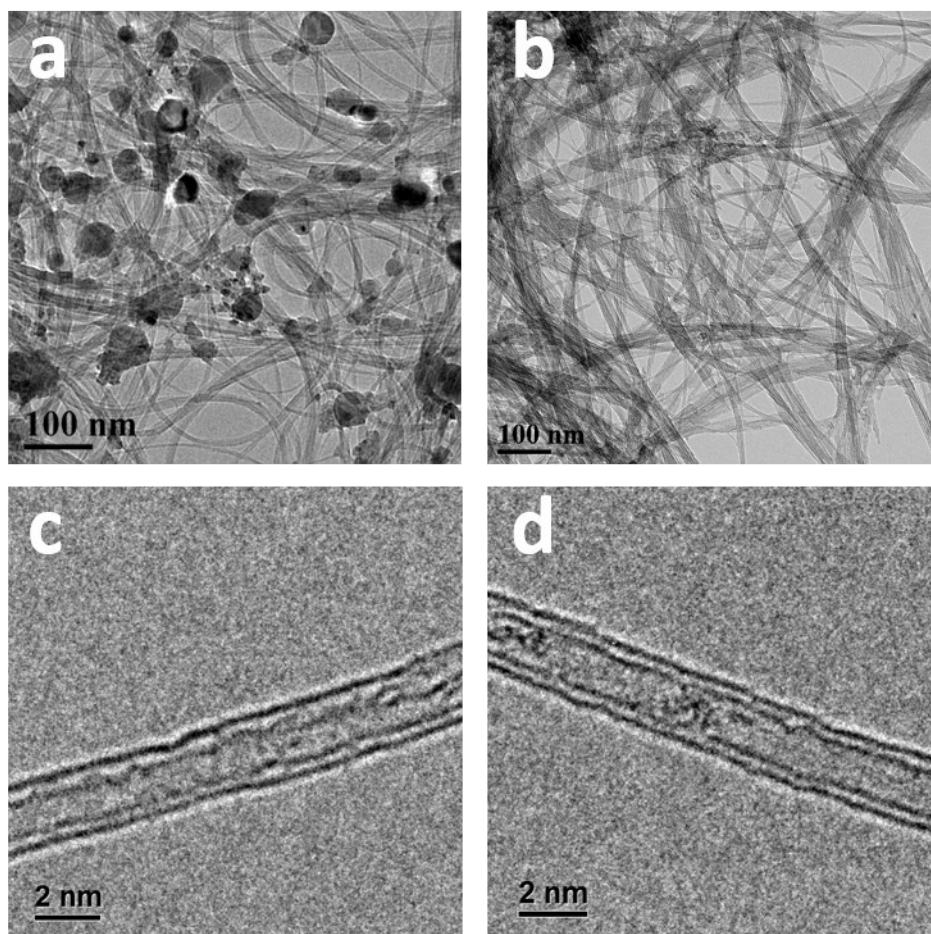

Figure S1. TEM images of DWCNTs a) before and b) after purification, c) and d) TEM images of a single DWCNT.

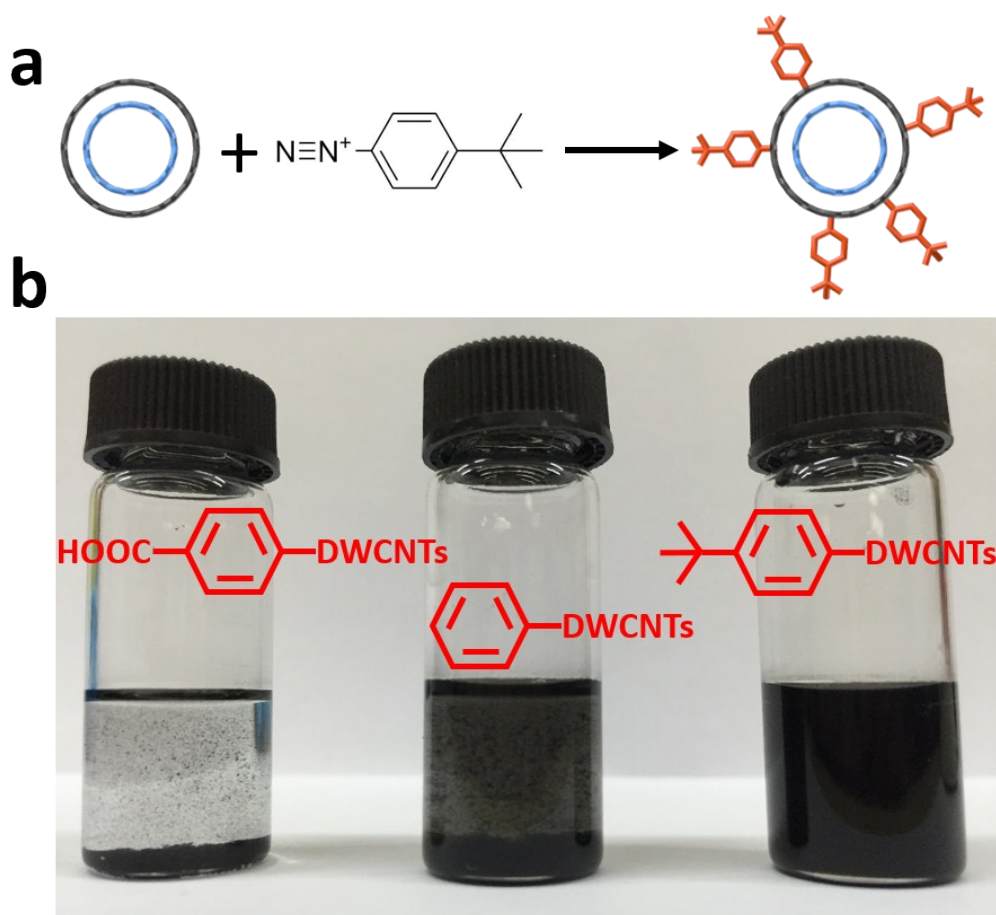

Figure S2. a) Schematic of DWCNT functionalized with 4-(*tert*-butyl)benzenediazonium. b) f-DWCNTs with different chemical groups dispersed in chlorobenzene.
